# Supplementary material for: Atmospheric lifetime of sulfur hexafluoride (SF 6 ) and five other trace gases in the BASCOE model driven by three reanalyses
Source: Copernicus journal article supplement (doi:10.5194/egusphere-2025-3597), 2025-08-13
Supplement: Supplementary file 1 [file egusphere-2025-3597-supplement.pdf]

## Supplementary material for:

*Atmospheric lifetime of sulfur hexafluoride (SF<sub>6</sub>) and five other trace gases in the BASCOE model driven by three reanalyses.*  
Sarah Vervalcke, Quentin Errera, Simon Chabrilat, Marc Op de beeck, Thomas Reddmann, Gabriele Stiller, Roland Eichinger, and Emmanuel Mahieu.

## 5 Evaluation of trace gas profiles

Figures S1-S6 show the normalized mean bias, the standard deviation and the correlation of the six long-lived species simulated with the BASCOE CTM compared to MIPAS and ACE-FTS observations. The next series of figures (S7-S16) show the modified normalised mean bias and the normalised standard deviation of BASCOE model output with respect to MIPAS and ACE-FTS observations.

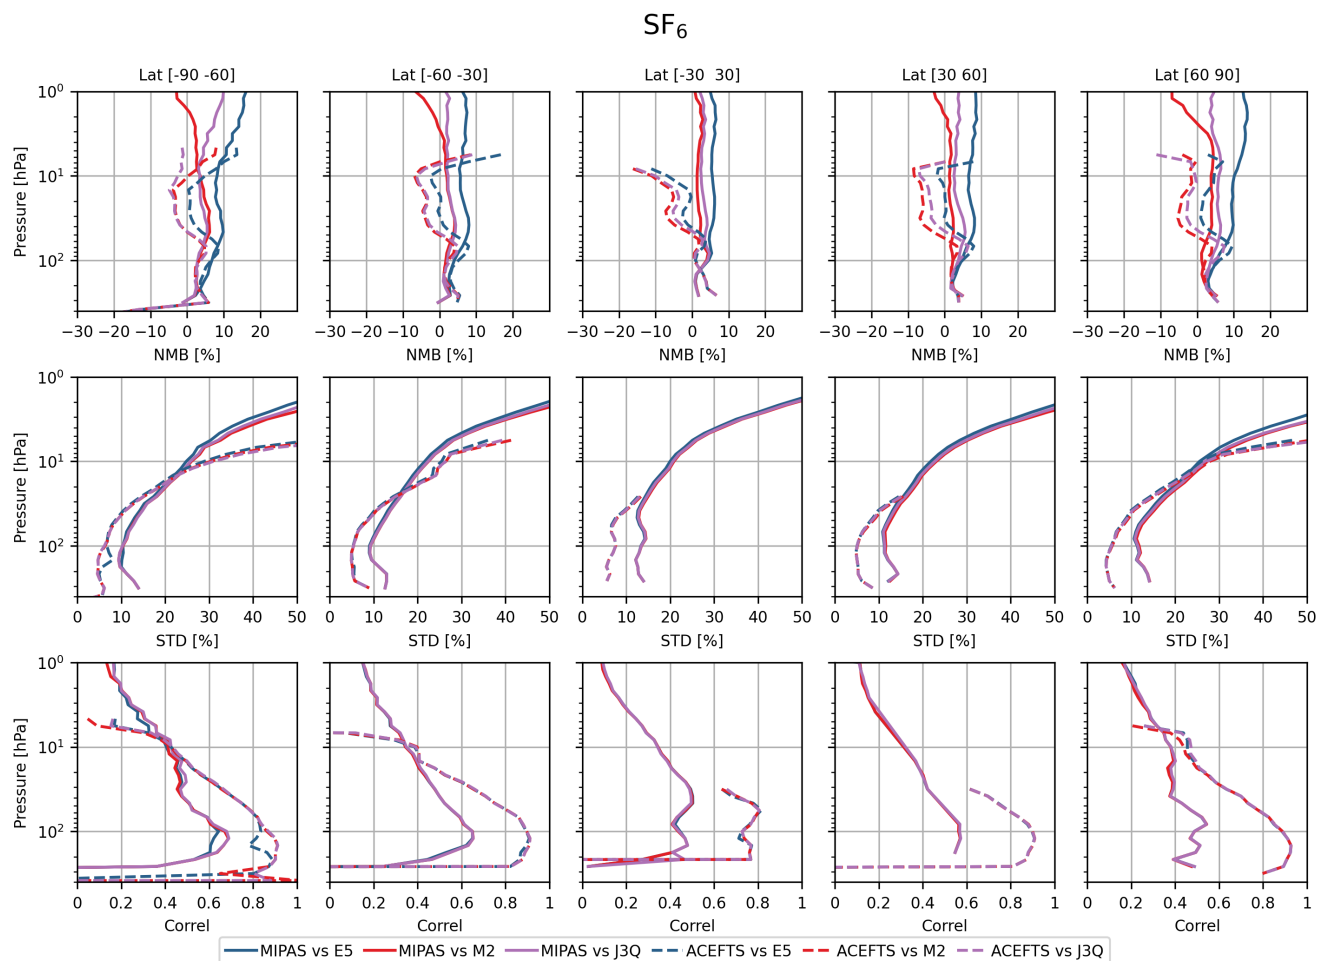

**Figure S1.** SF<sub>6</sub> statistics with respect to MIPAS and ACE-FTS

## N<sub>2</sub>O

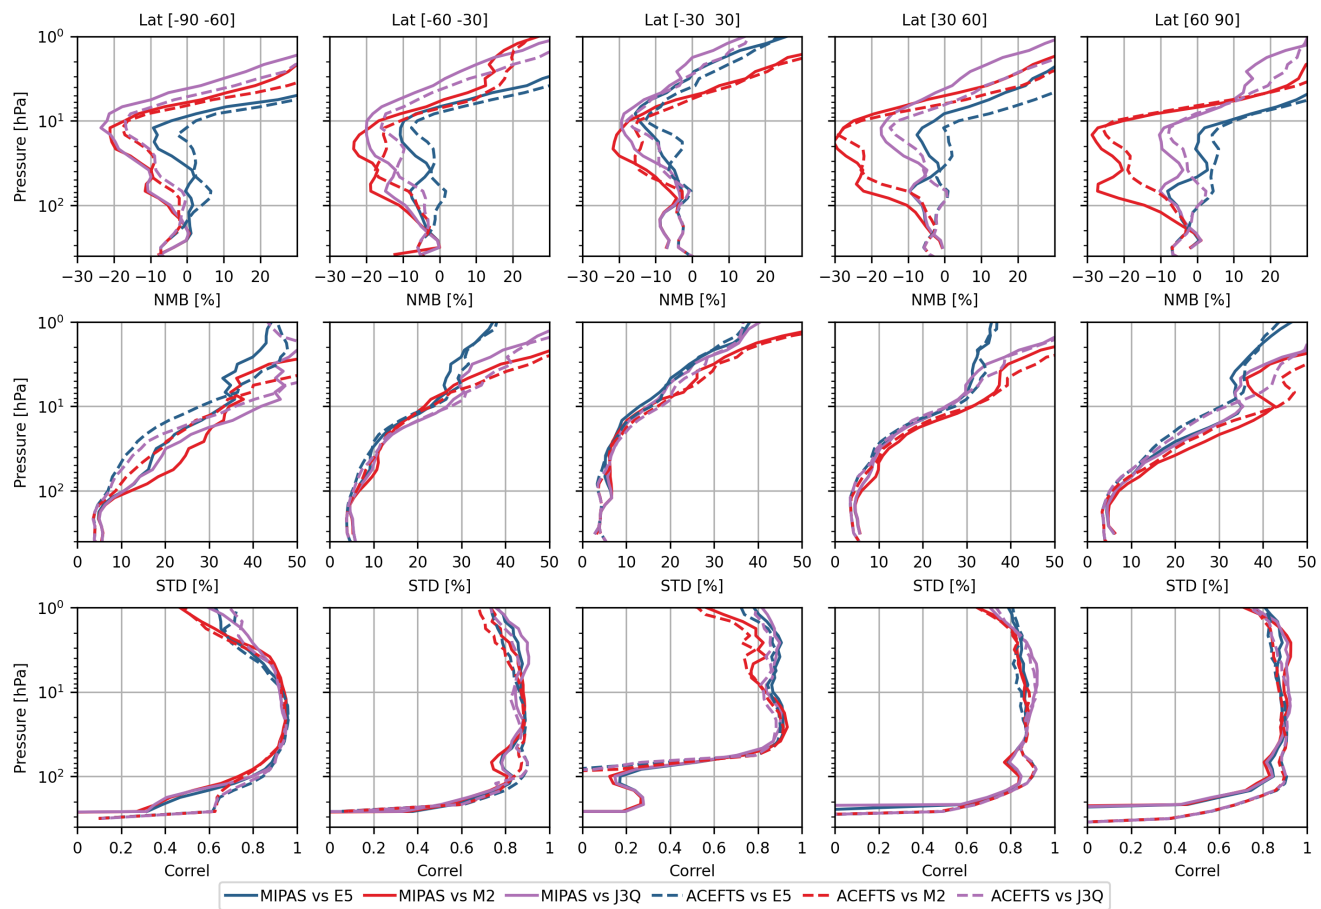

**Figure S2.** N<sub>2</sub>O statistics with respect to MIPAS and ACE-FTS

# CFC-11

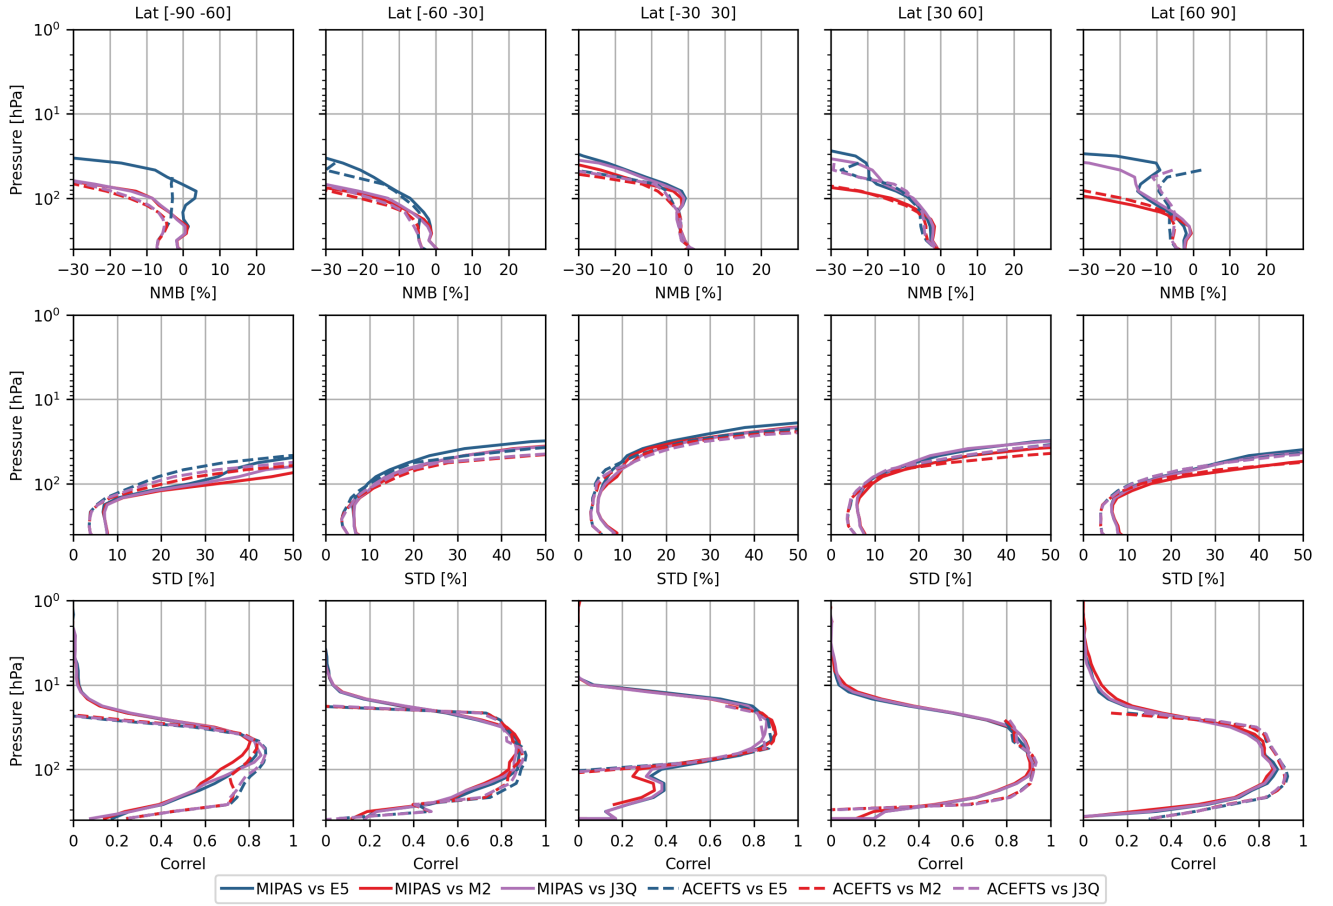

**Figure S3.** CFC-11 statistics with respect to MIPAS and ACE-FTS

# CFC-12

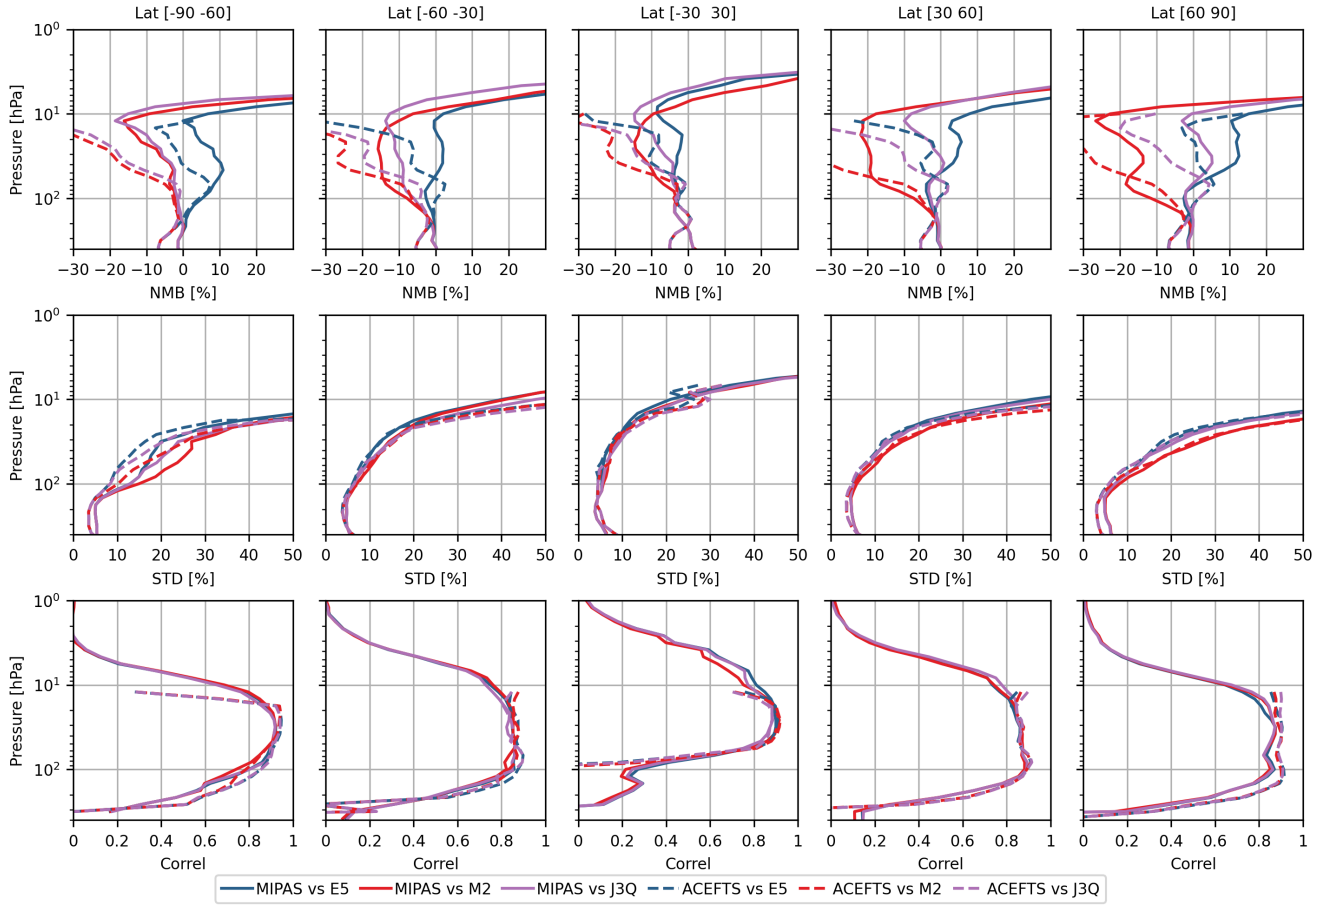

**Figure S4.** CFC-12 statistics with respect to MIPAS and ACE-FTS



# CH<sub>4</sub>

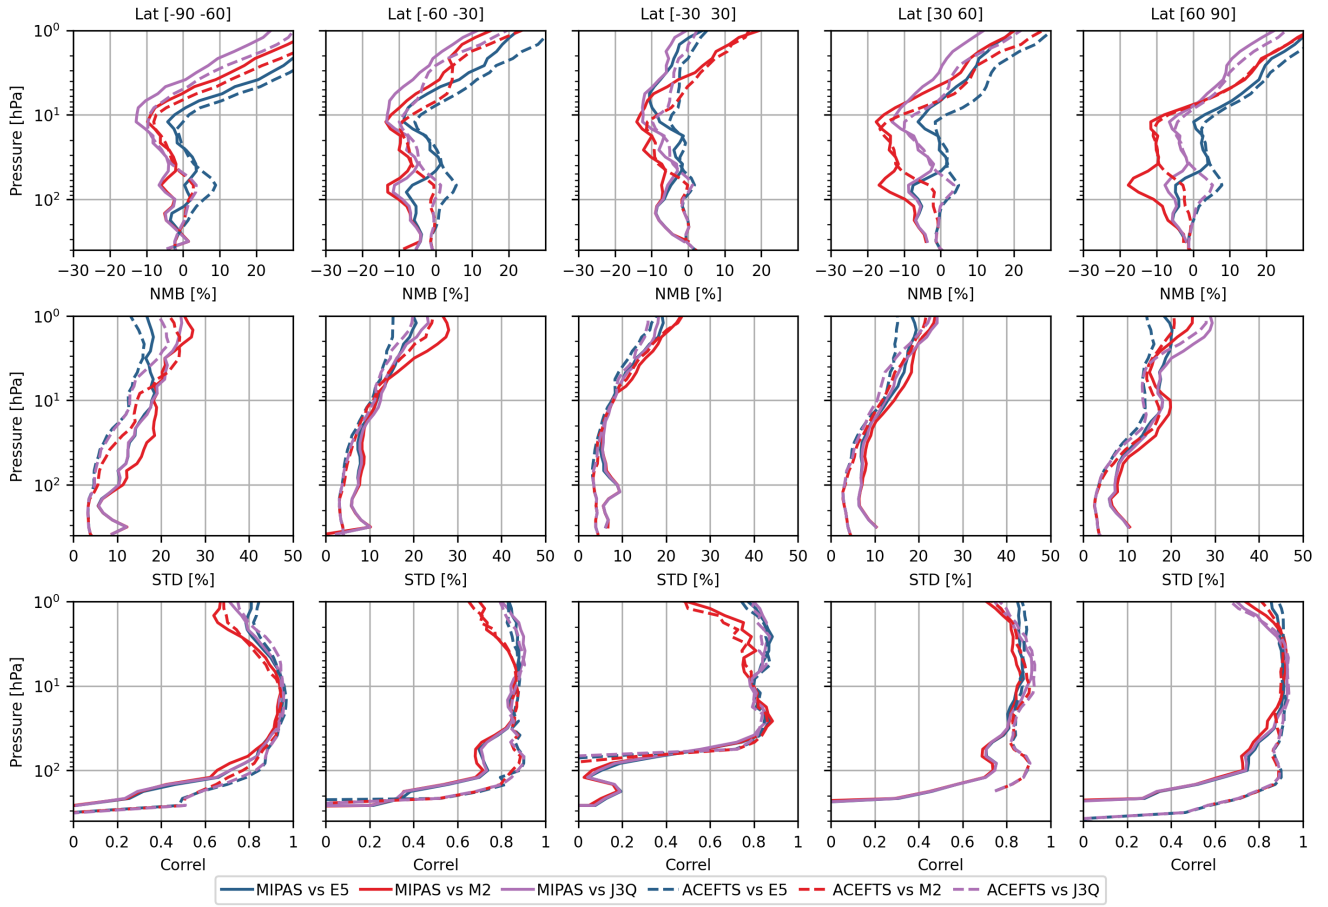

**Figure S5.** CH<sub>4</sub> statistics with respect to MIPAS and ACE-FTS

## HCFC-22

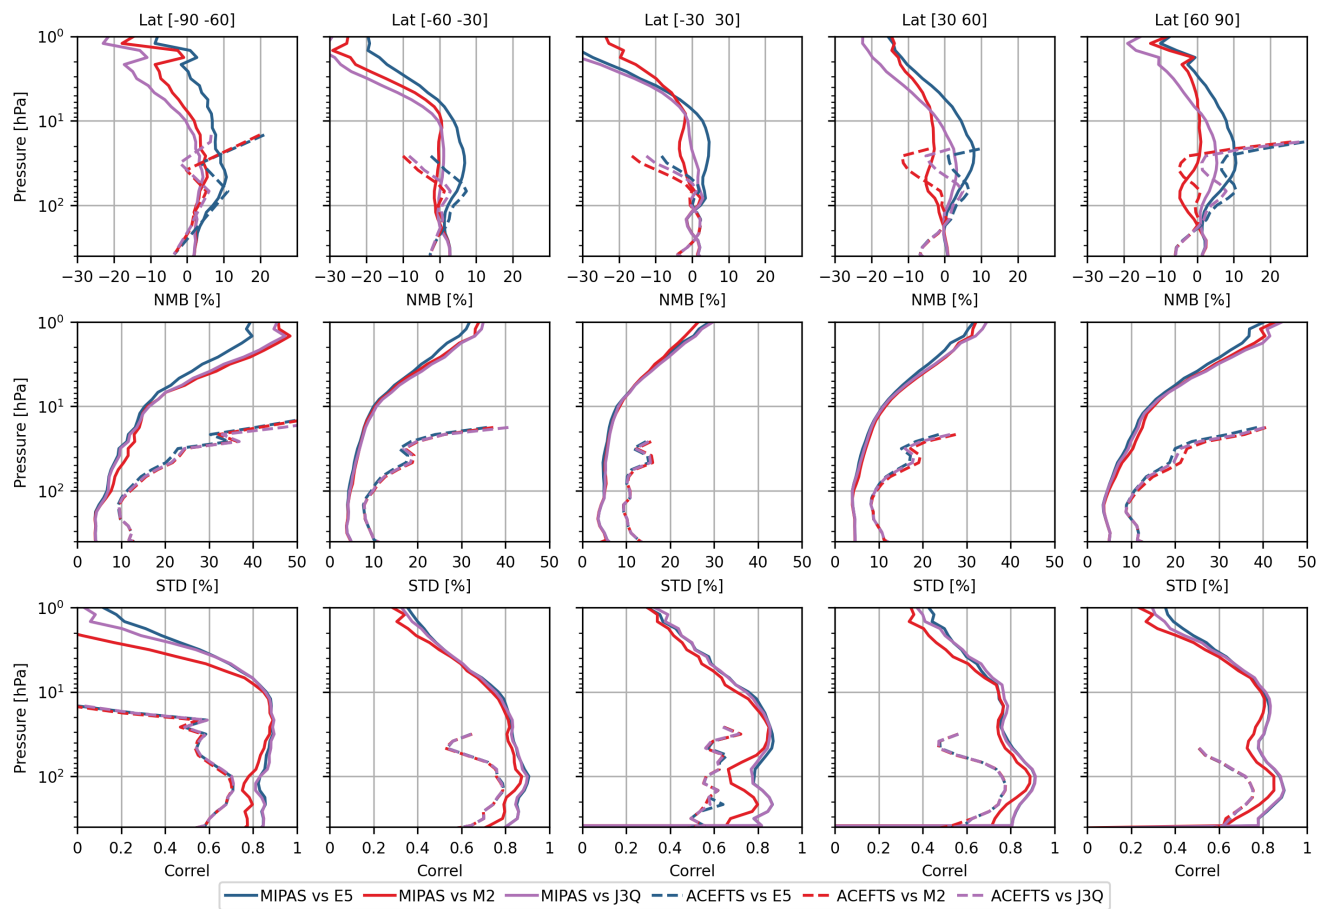

**Figure S6.** HCFC-22 statistics with respect to MIPAS and ACE-FTS

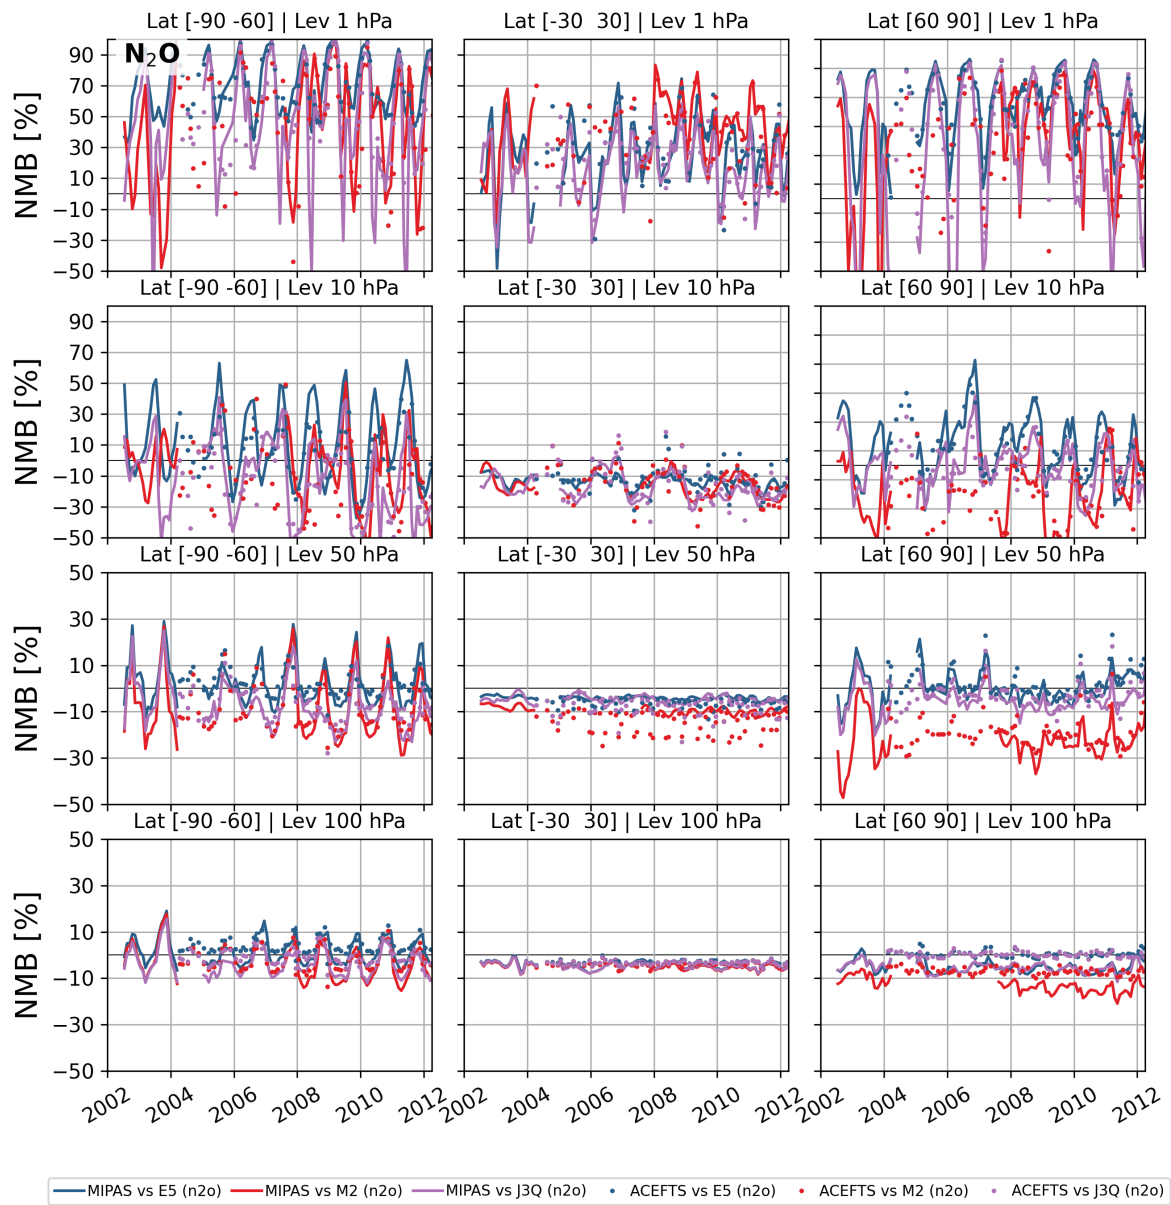

**Figure S7.** Modified normalised mean bias of BASCOE N<sub>2</sub>O with respect to MIPAS and ACE-FTS.

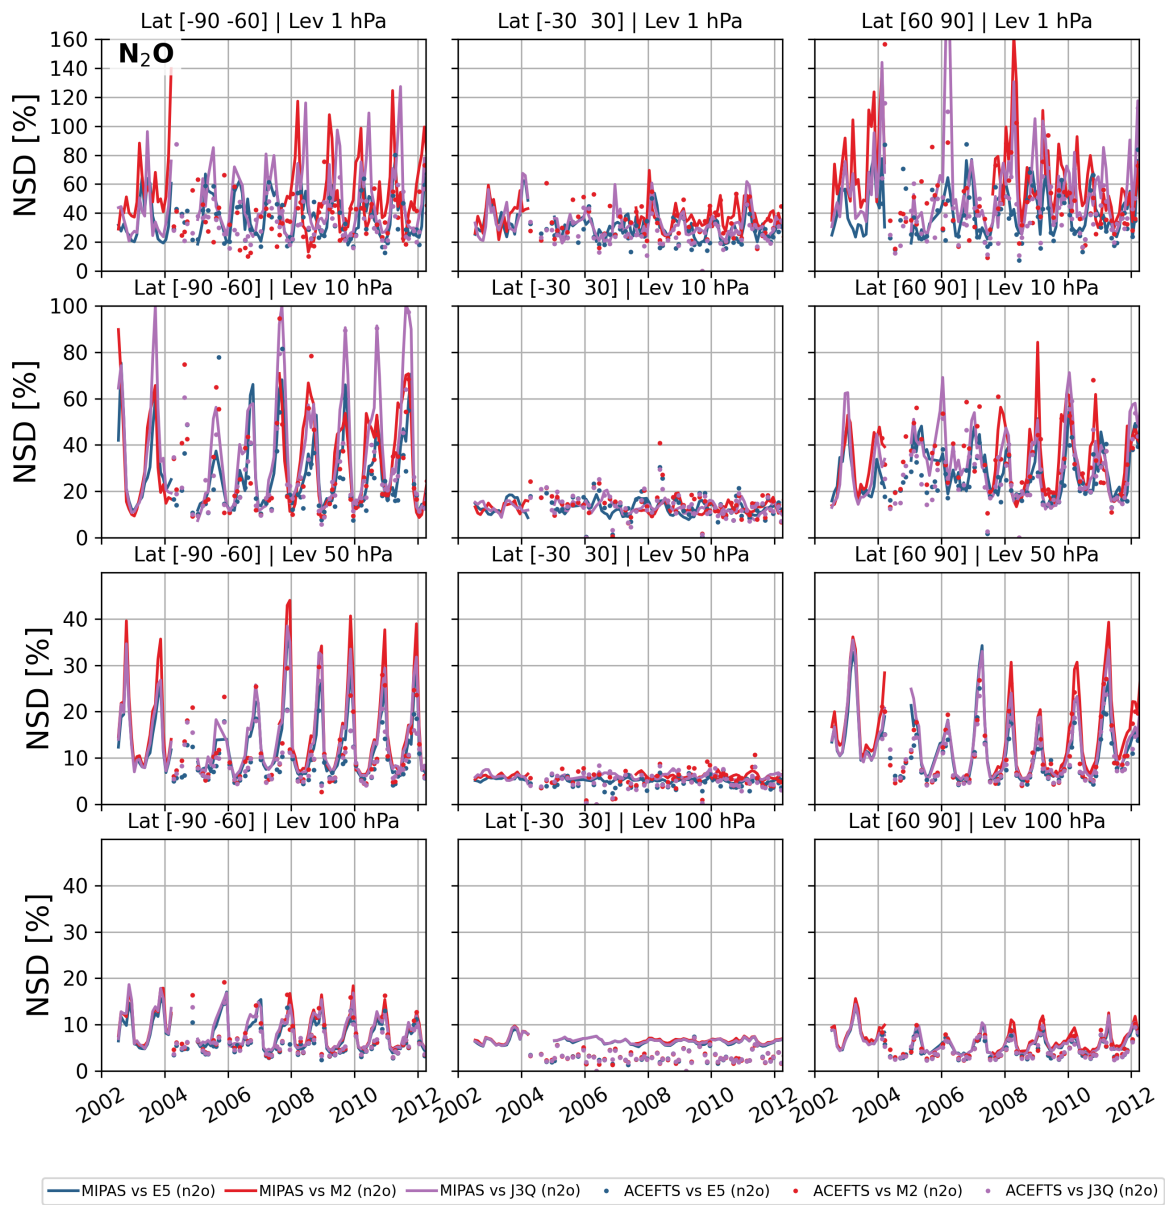

**Figure S8.** Normalised standard deviation of BASCOE N<sub>2</sub>O with respect to MIPAS and ACE-FTS.

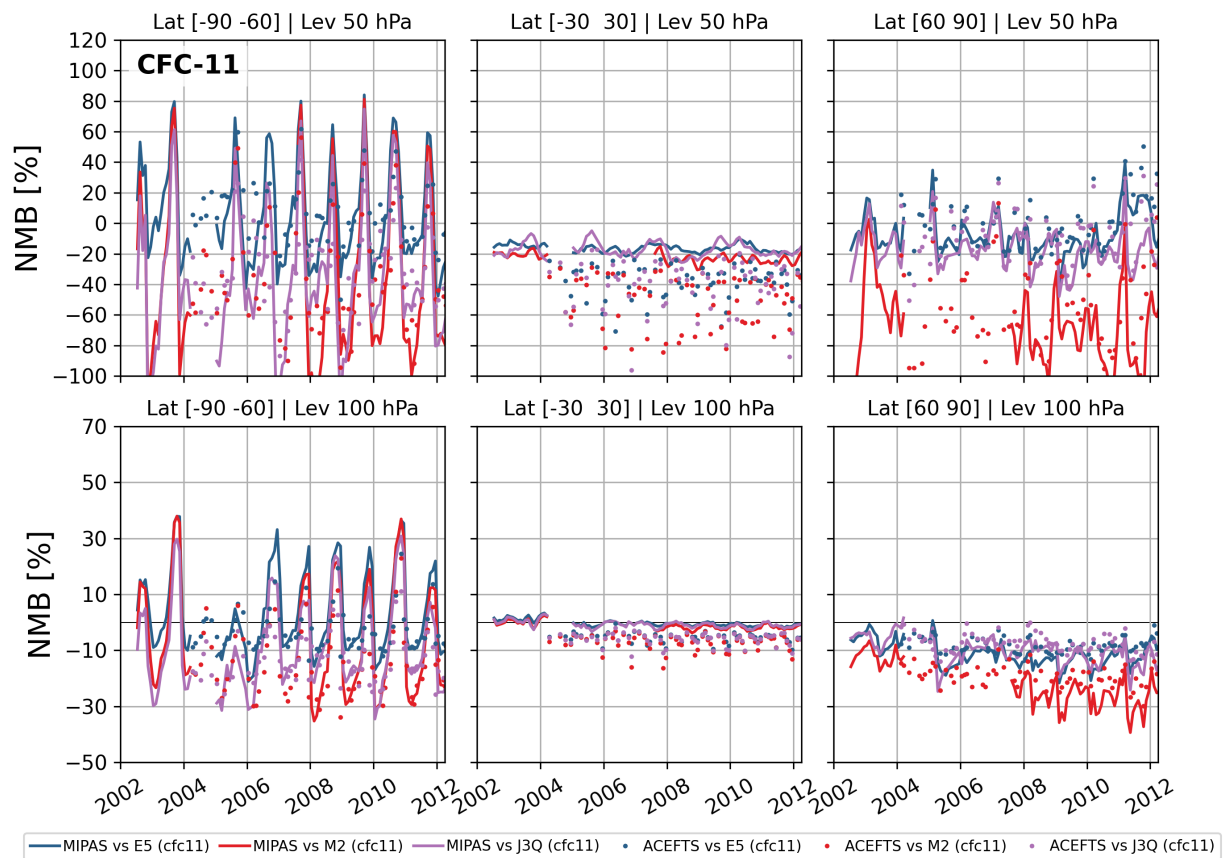

**Figure S9.** Modified normalised mean bias of BASCOE CFC-11 with respect to MIPAS and ACE-FTS.

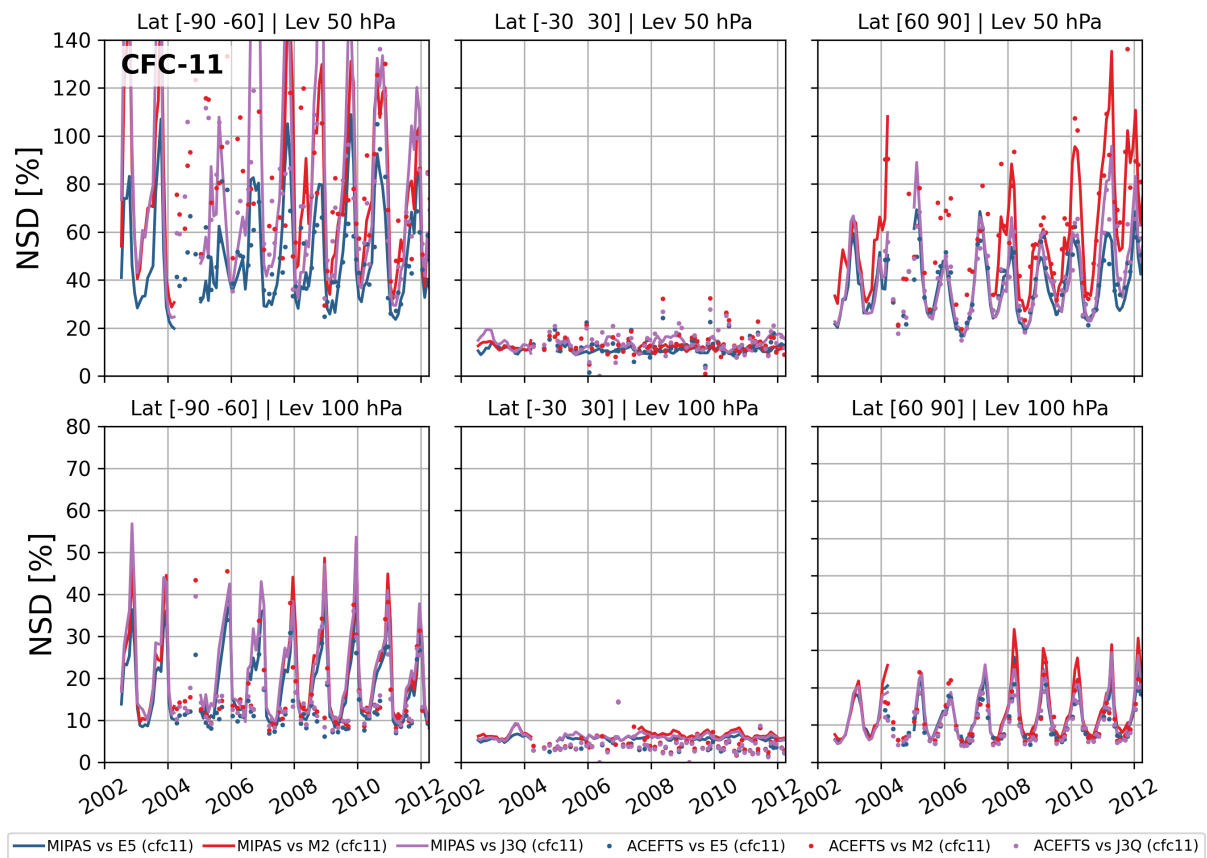

**Figure S10.** Normalised standard deviation of BASCOE CFC-11 with respect to MIPAS and ACE-FTS.

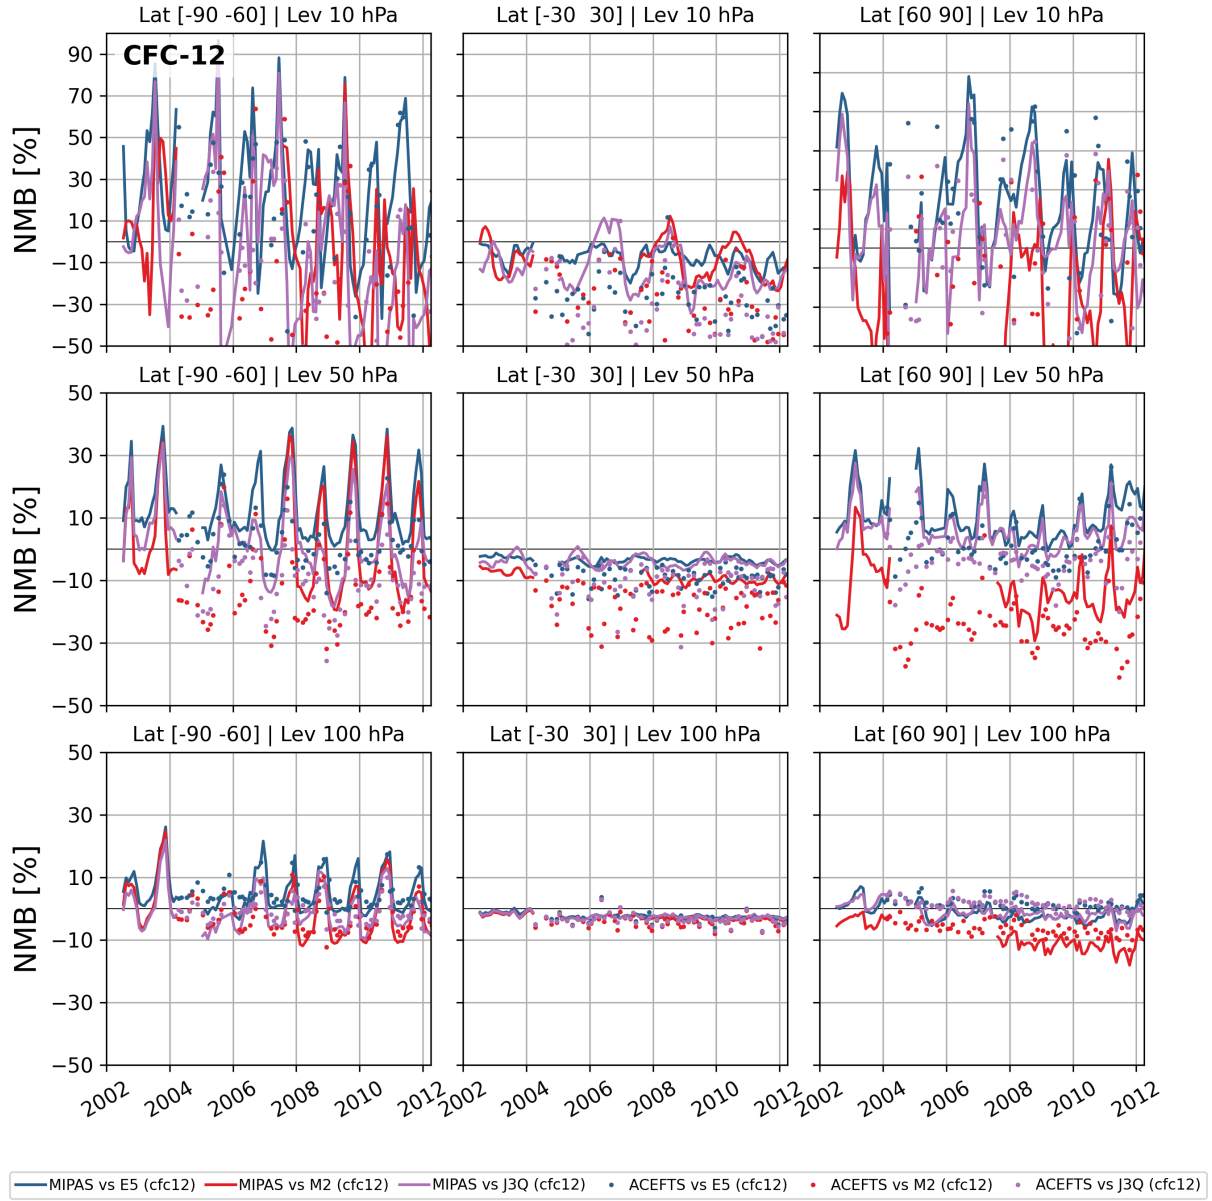

**Figure S11.** Modified normalised mean bias of BASCOE CFC-12 with respect to MIPAS and ACE-FTS.

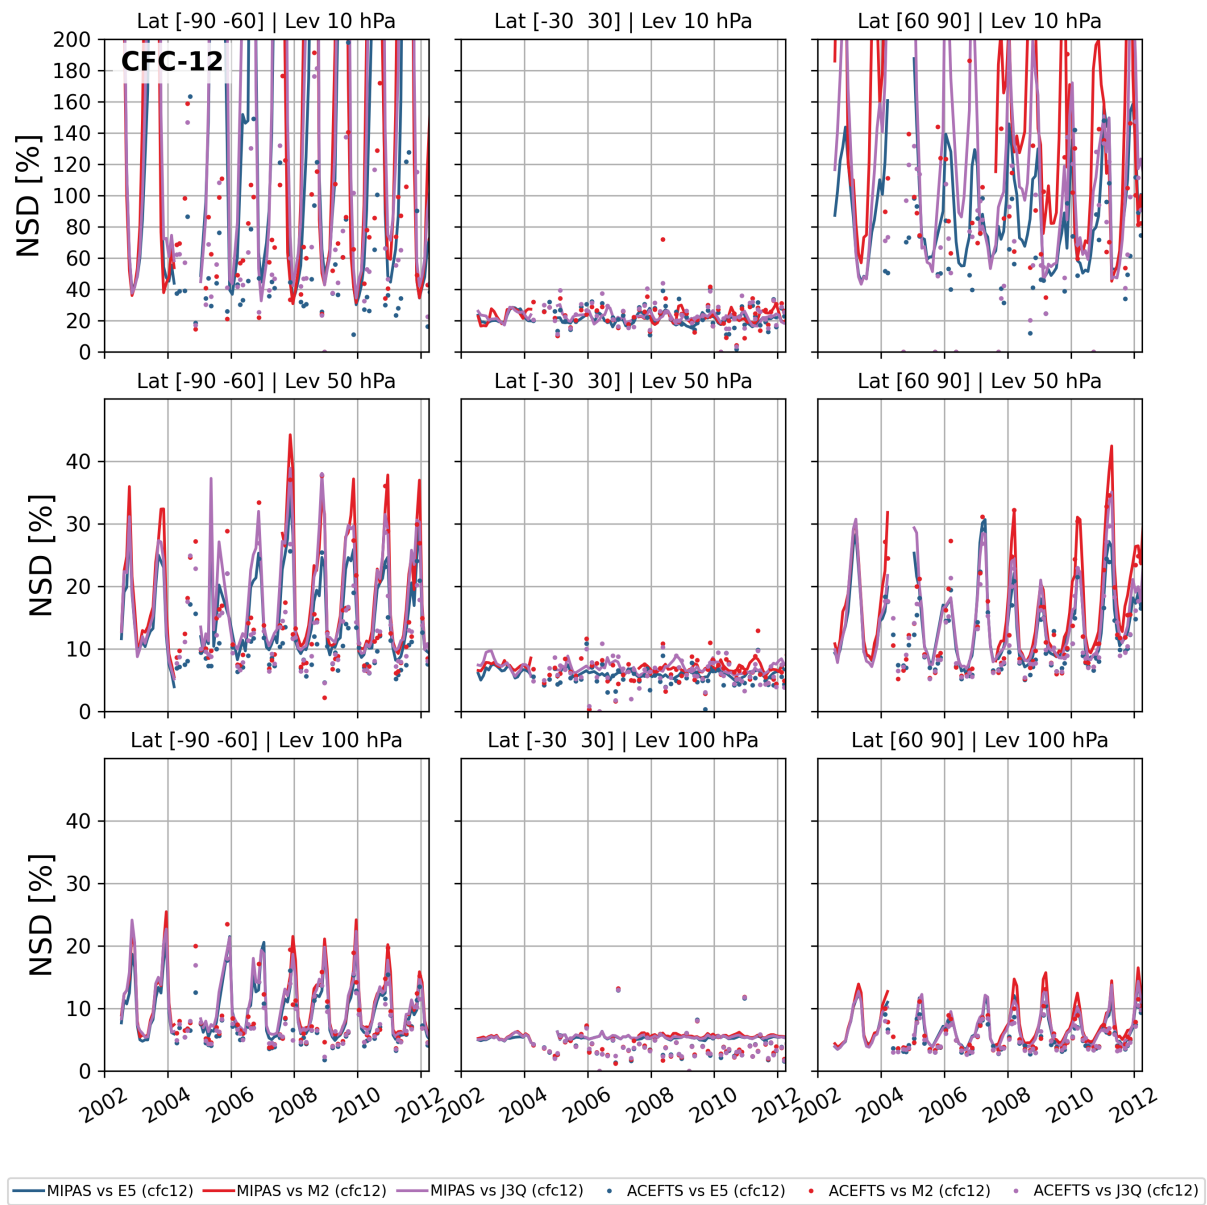

**Figure S12.** Normalised standard deviation of BASCOE CFC-12 with respect to MIPAS and ACE-FTS.



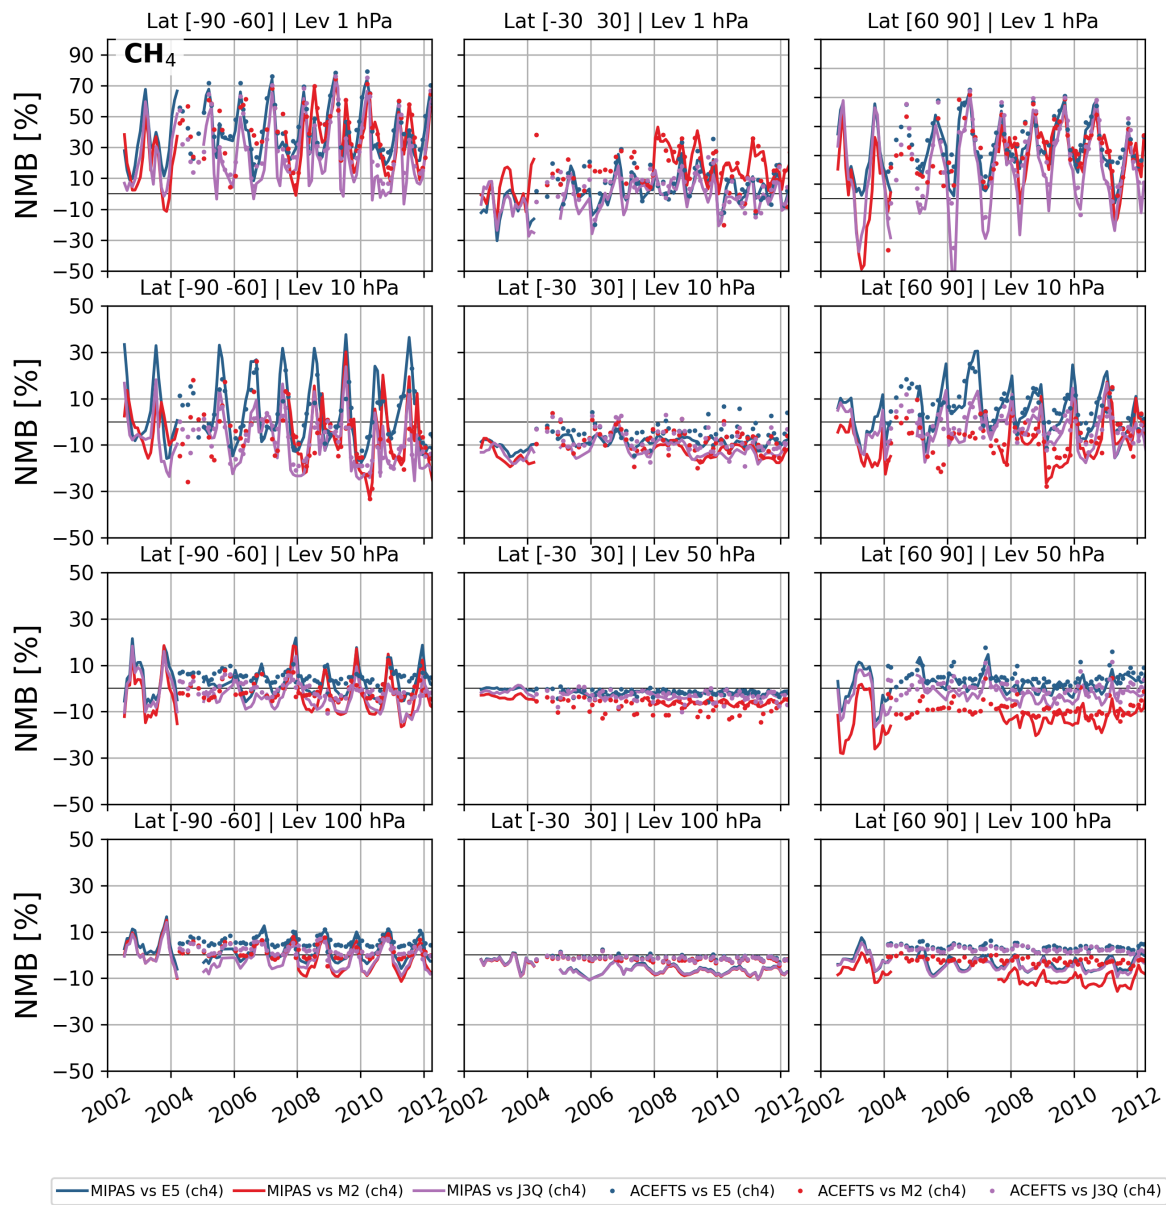

**Figure S13.** Modified normalised mean bias of BASCOE CH<sub>4</sub> with respect to MIPAS and ACE-FTS.

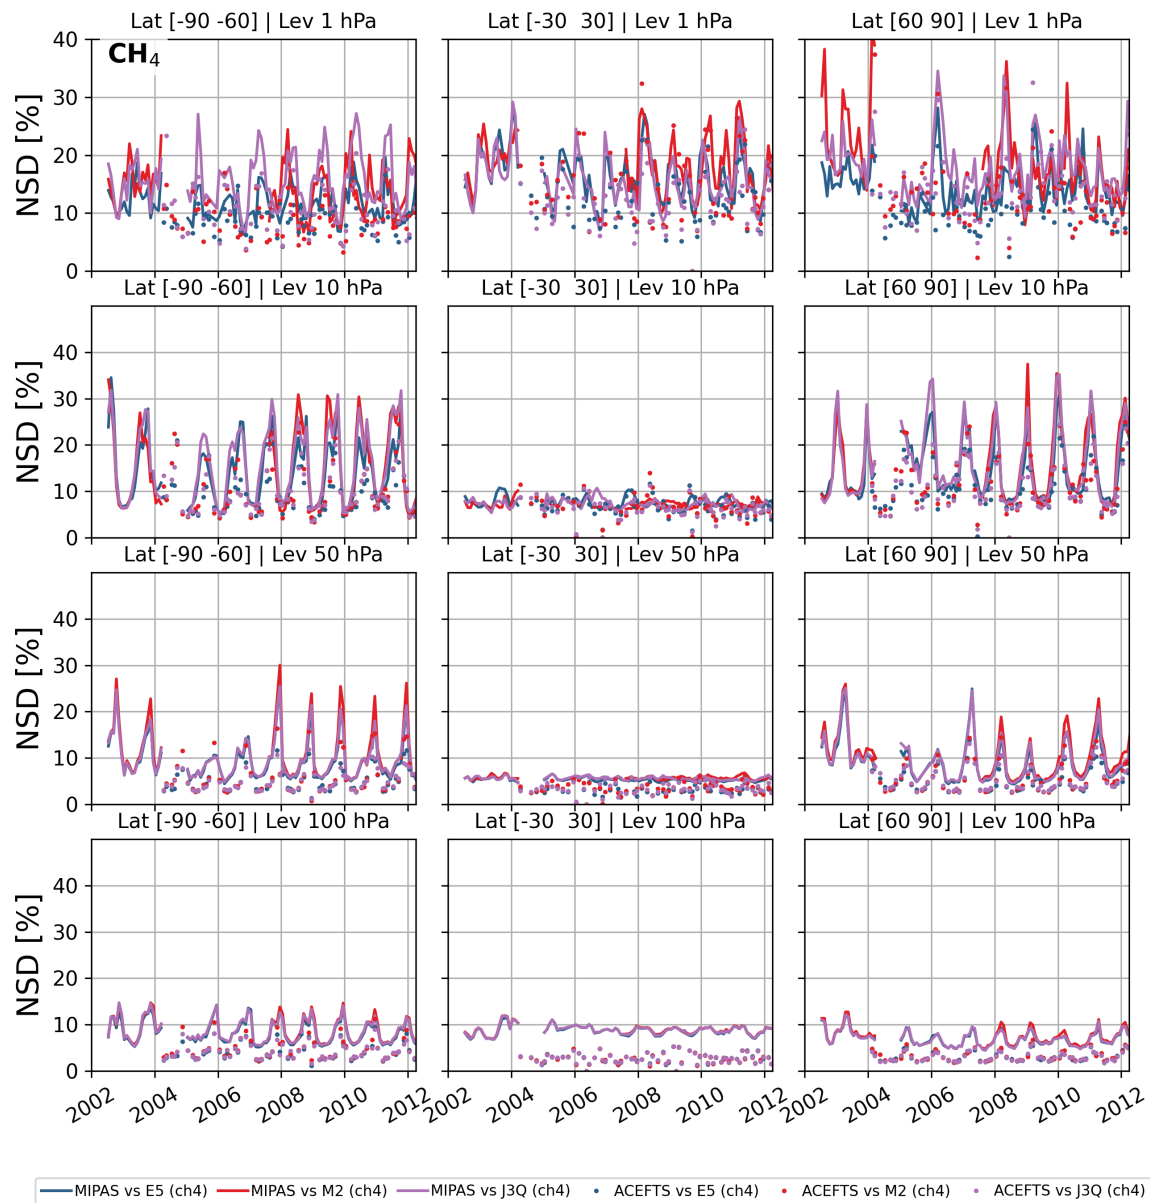

**Figure S14.** Normalised standard deviation of BASCOE CH<sub>4</sub> with respect to MIPAS and ACE-FTS.

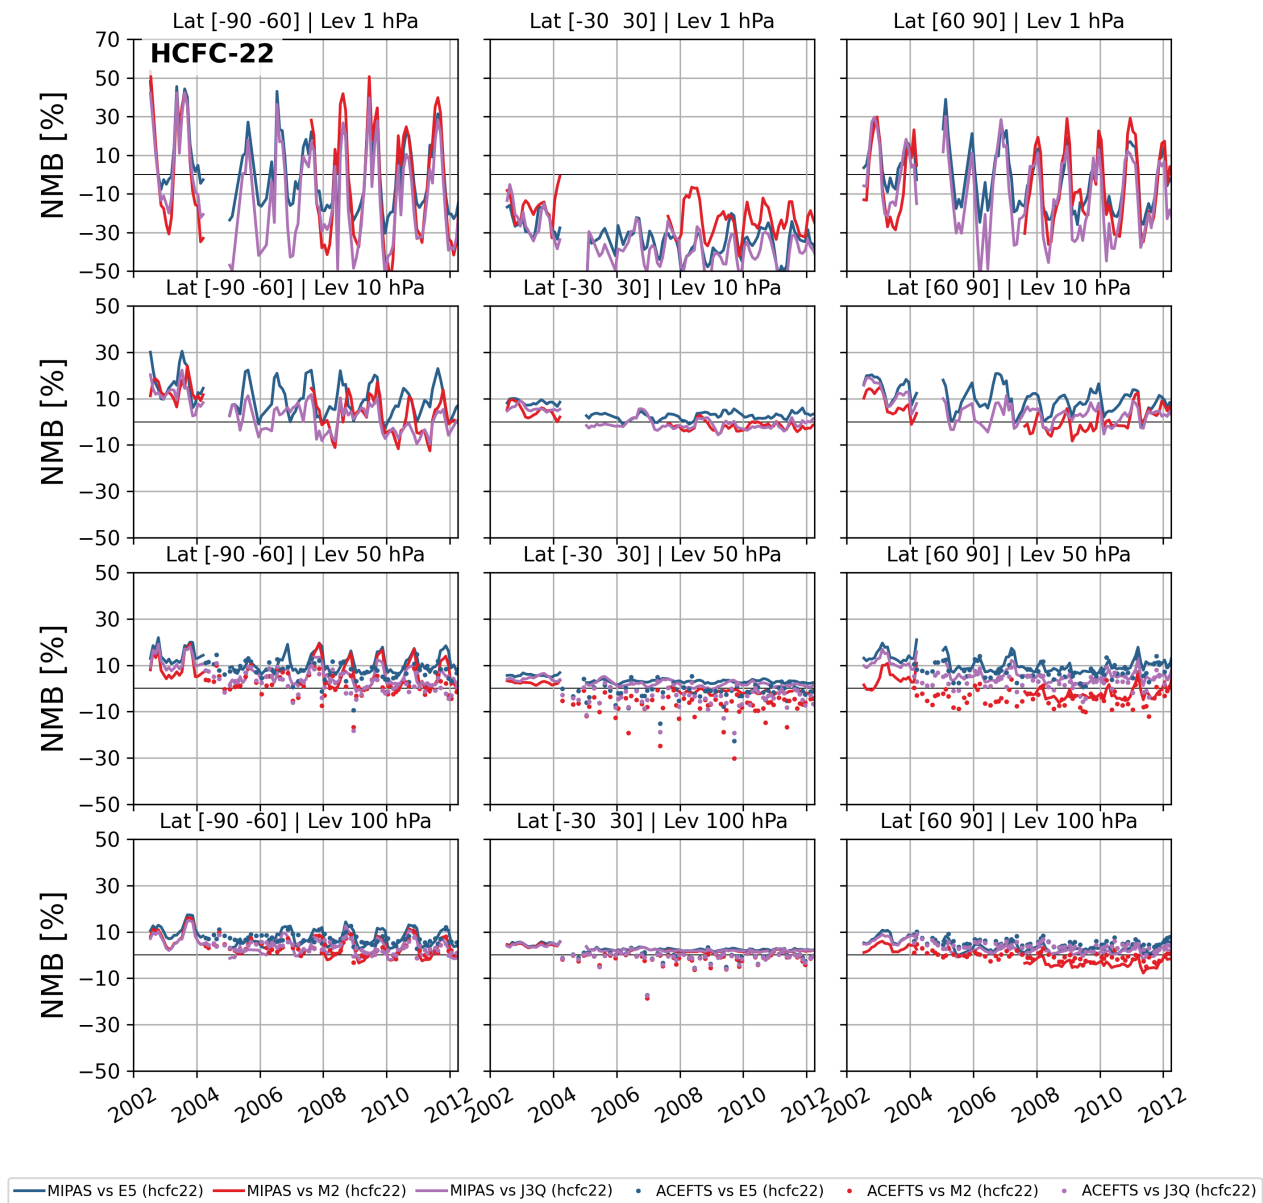

**Figure S15.** Modified normalised mean bias of BASCOE HCFC-22 with respect to MIPAS and ACE-FTS.

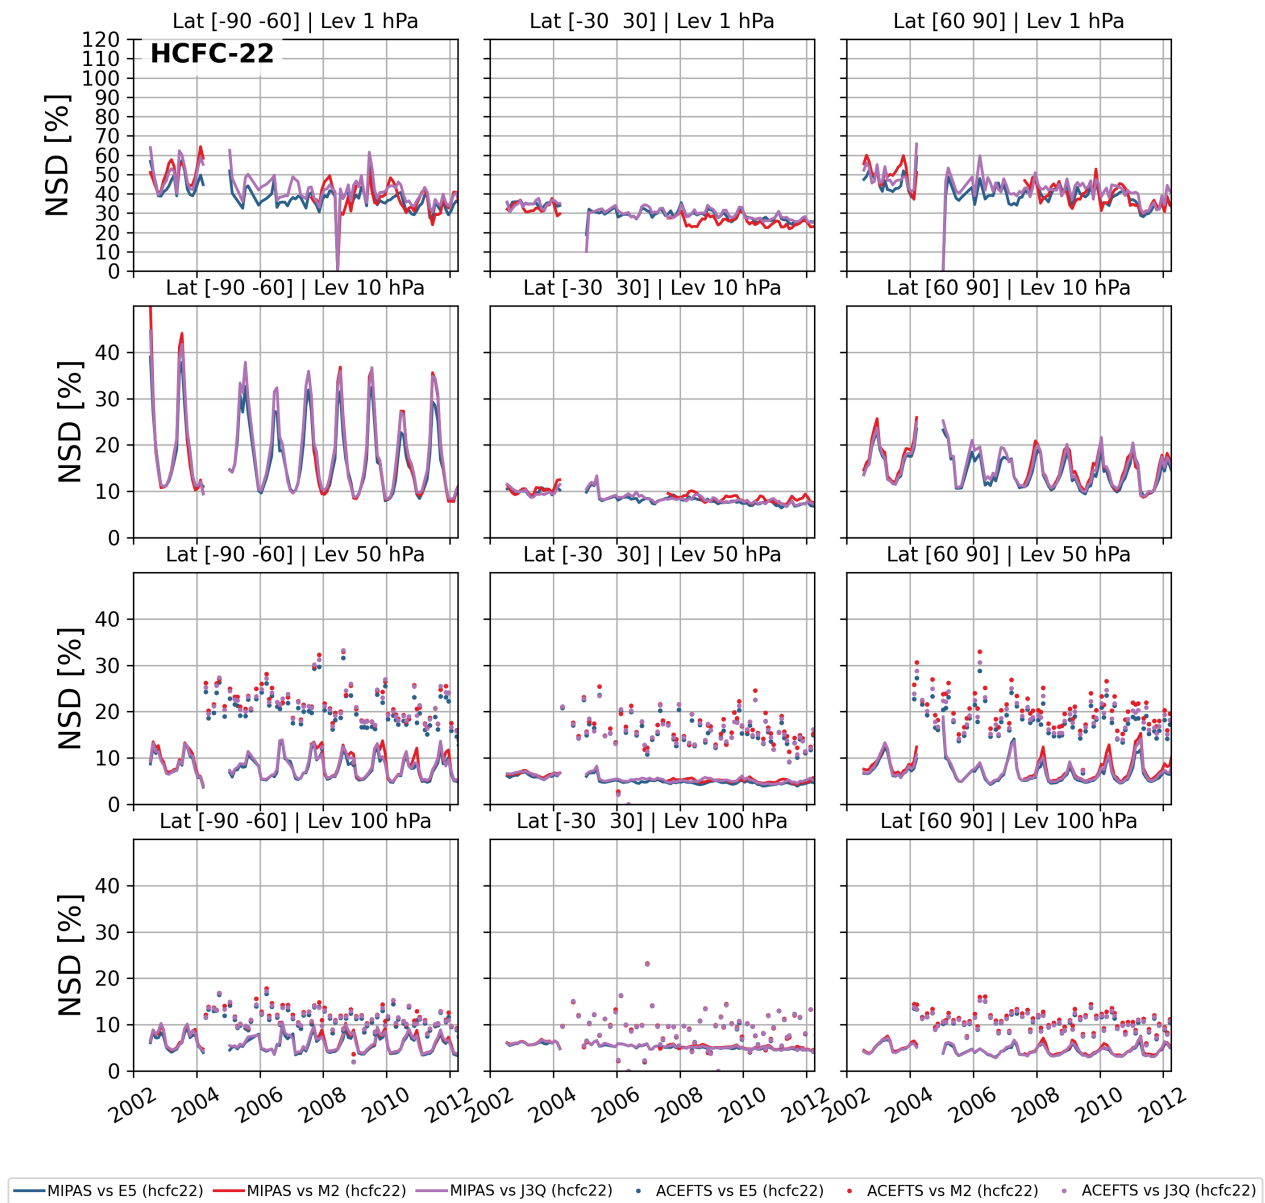

**Figure S16.** Normalised standard deviation of BASCOE HCFC-22 with respect to MIPAS and ACE-FTS.
